# Supplementary material for: The importance of tyrosines in multimers of cyclic RGD nonapeptides: towards αvβ6-integrin targeted radiotherapeutics
Source: Royal Society of Chemistry journal article supplement (doi:10.1039/d4md00073k), 2024-01-01
Supplement: d4md00073k1.pdf [file d4md00073k1.pdf]

Supplemental Information

**The importance of tyrosines in multimers of cyclic RGD  
nonapeptides: towards  $\alpha\beta6$ -integrin targeted  
radiotherapeutics**

Neil Gerard Quigley, Maximilian Alexander Zierke, Beatrice Stefanie Ludwig, Frauke Richter, Nghia  
Nguyen, Falco Reissig, Jakub Šimeček, Susanne Kossatz\*, Johannes Notni\*

# 1. HPLC and ESI-MS data

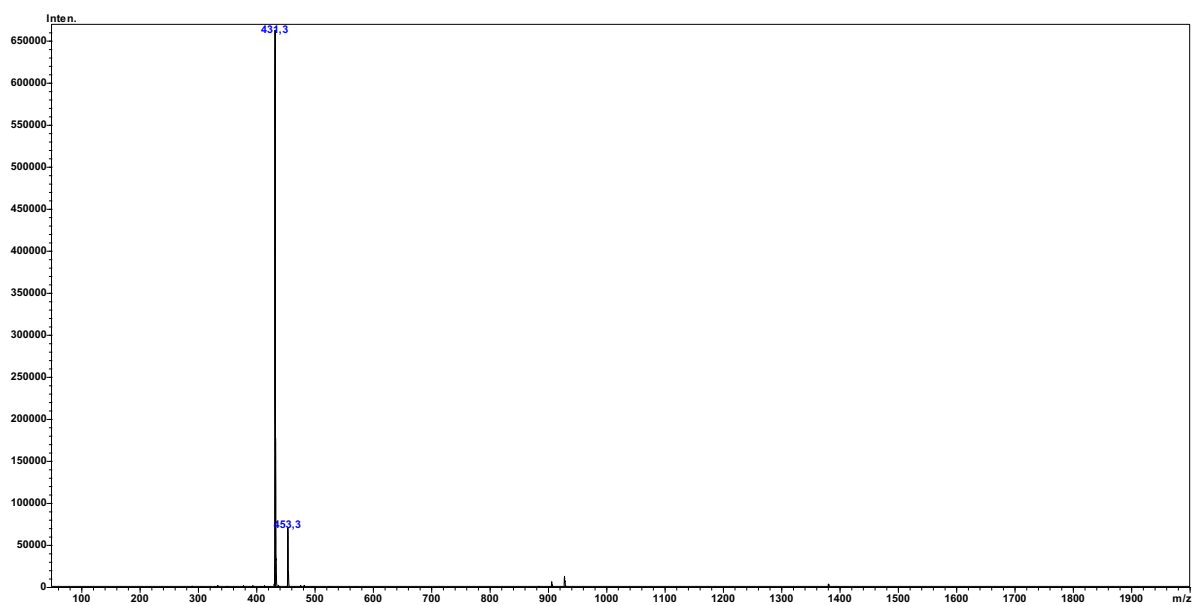

**Figure S1.** ESI-MS of **GFK-alkyne**; m/z corresponds to molecular composition as follows: 431.3  $[M+H]^+$ , 453.3  $[M+Na]^+$ .

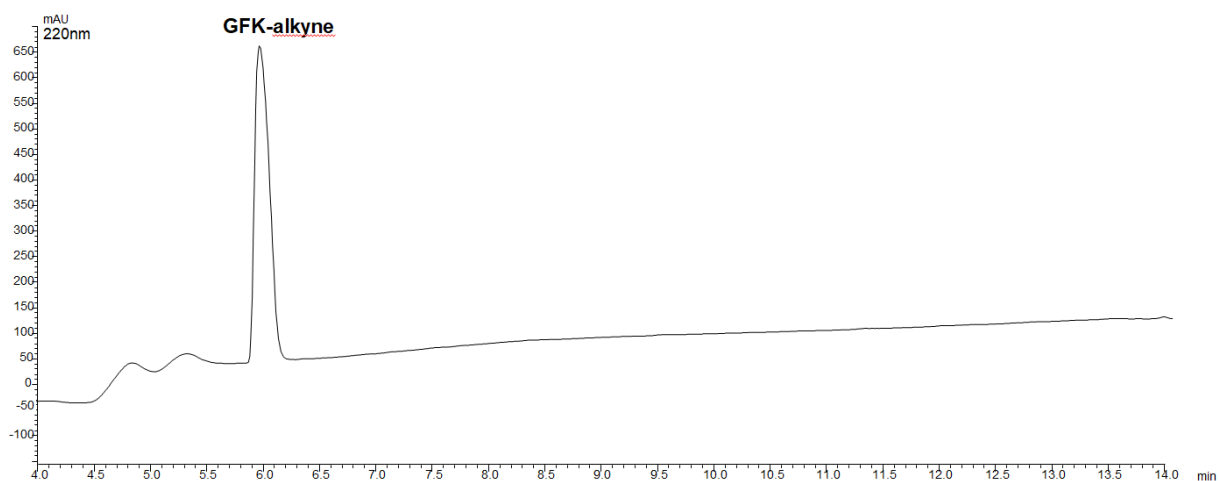

**Figure S2.** RP-HPLC of **GFK-alkyne** using analytical column AC2; 0.5 mL/min; gradient: 10–90% B in 15 min;  $t_R$  = 6.0 min.

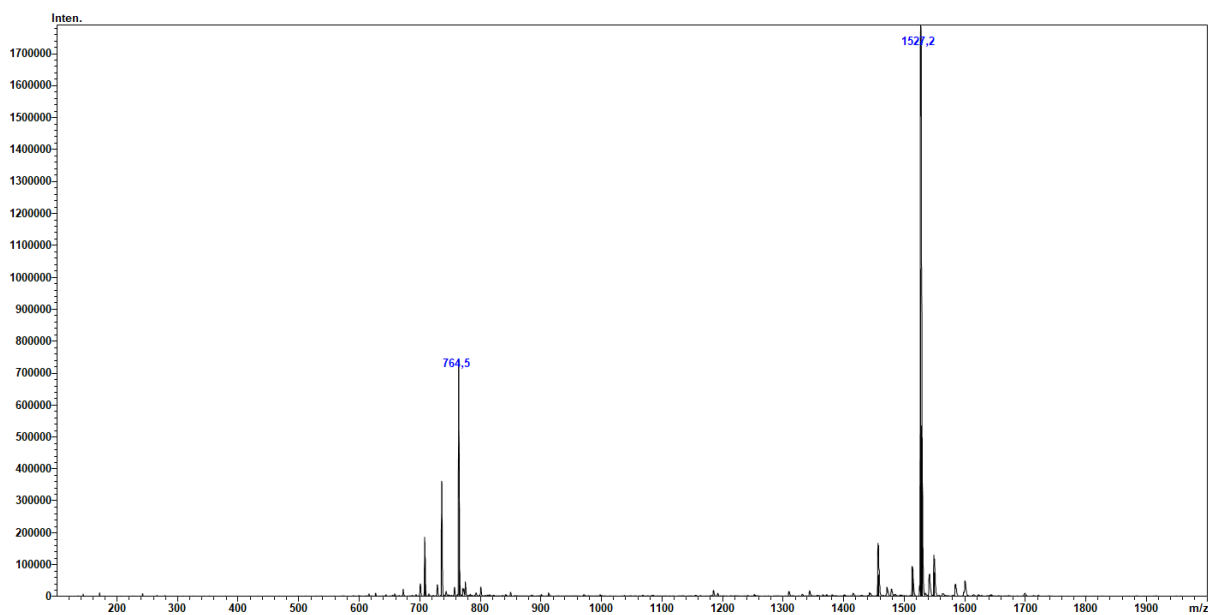

**Figure S3.** ESI-MS of **FY-Suc**; m/z corresponds to molecular composition as follows: 1527.2  $[M+H]^+$ , 764.5  $[M+2H]^{2+}$ .

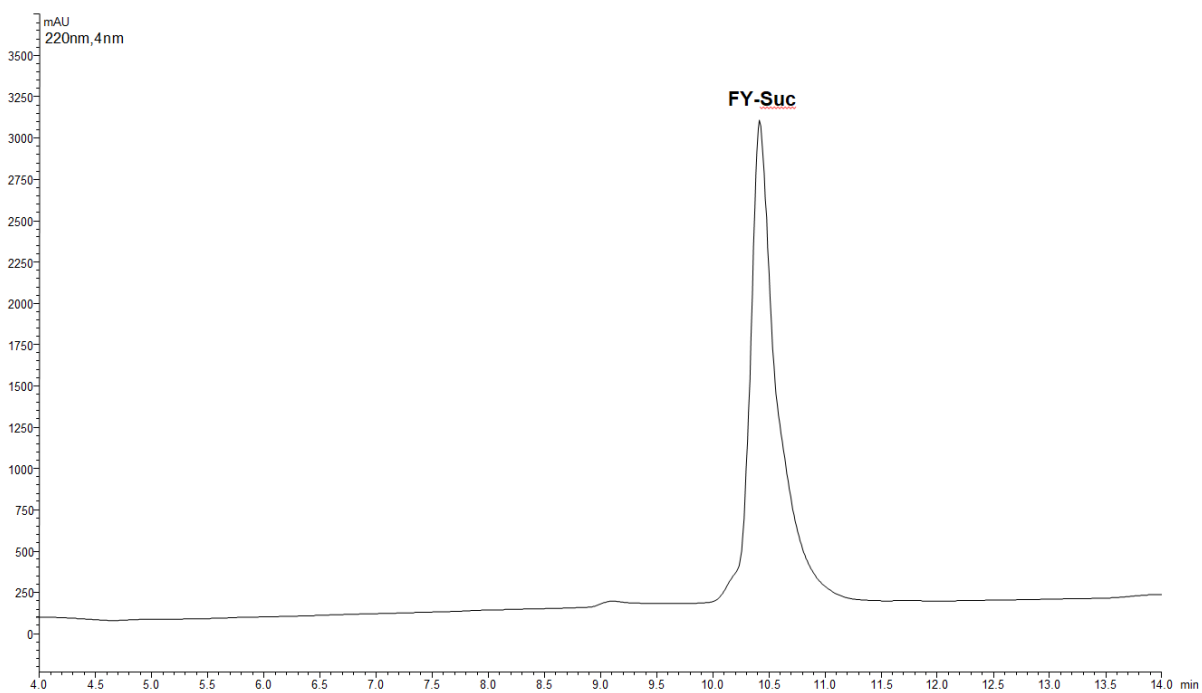

**Figure S4.** RP-HPLC of **FY-Suc** using analytical column AC2; 0.5 mL/min; gradient: 5–95 % B in 15 min;  $t_R$  = 10.5 min.

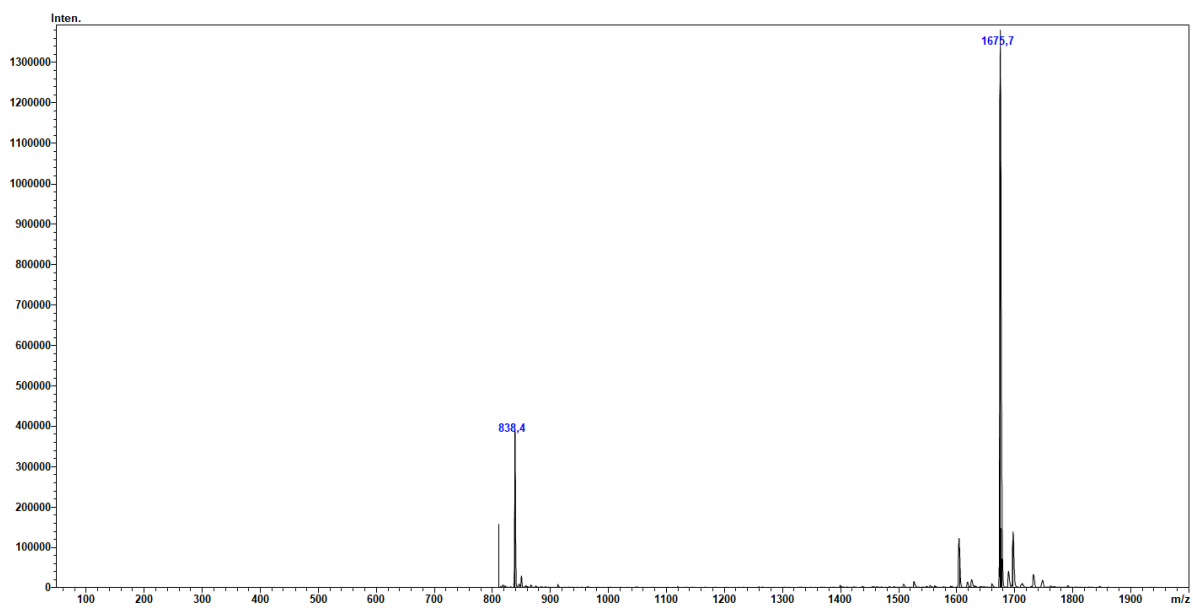

**Figure S5.** ESI-MS of **FY-Suc-TFP**. m/z corresponds to molecular composition as follows: 1675.7 [M+H]<sup>+</sup>, 838.4 [M+2H]<sup>2+</sup>.

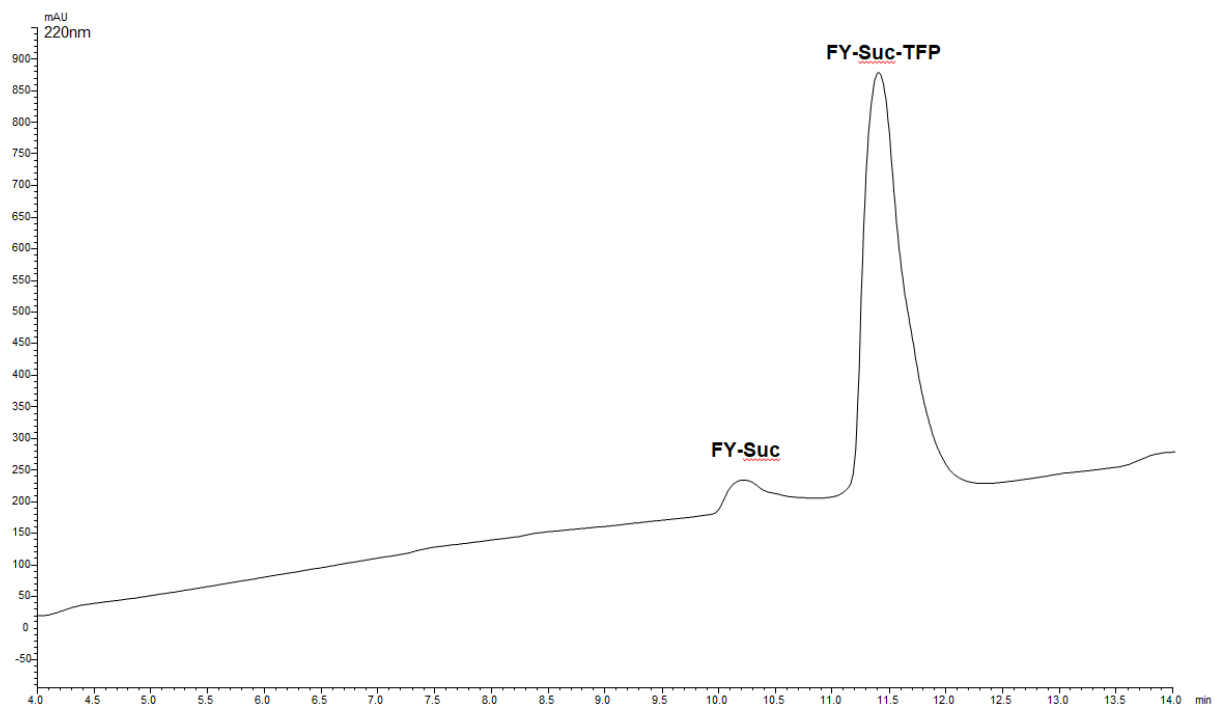

**Figure S6.** RP-HPLC of **FY-Suc-TFP** using analytical column AC2; 0.5 mL/min; gradient: 10–90 % B in 15 min;  $t_R = 11.5$  min.

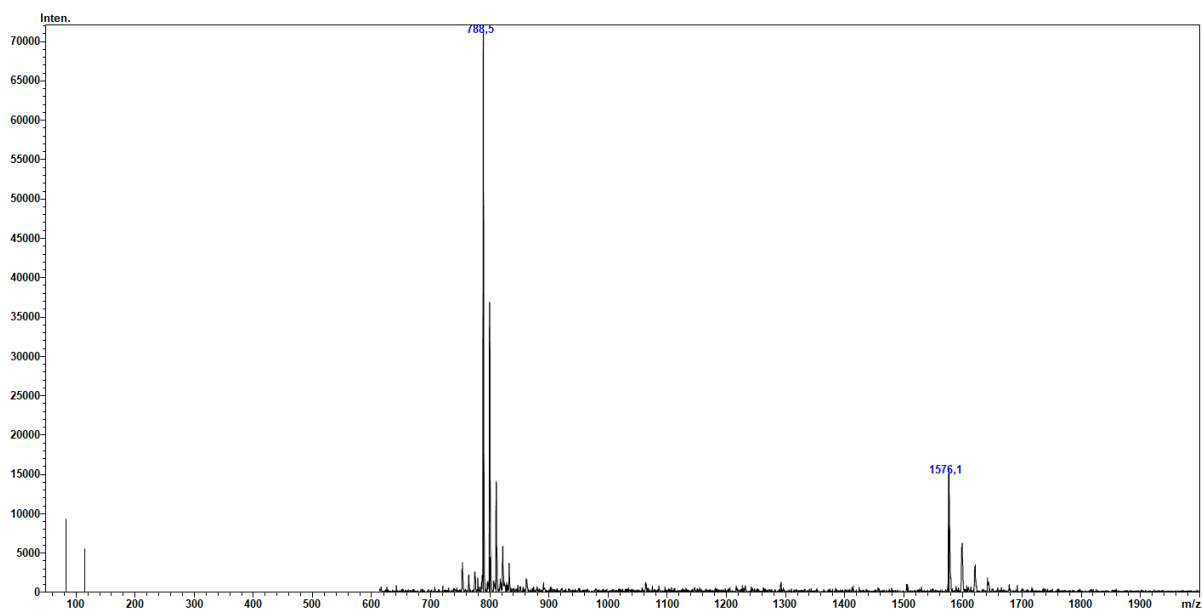

**Figure S7.** ESI-MS of **GFK-FY**.  $m/z$  corresponds to molecular composition as follows: 1576.1  $[M+H^+]^+$ , 788.5  $[M+2H^+]^{2+}$ .

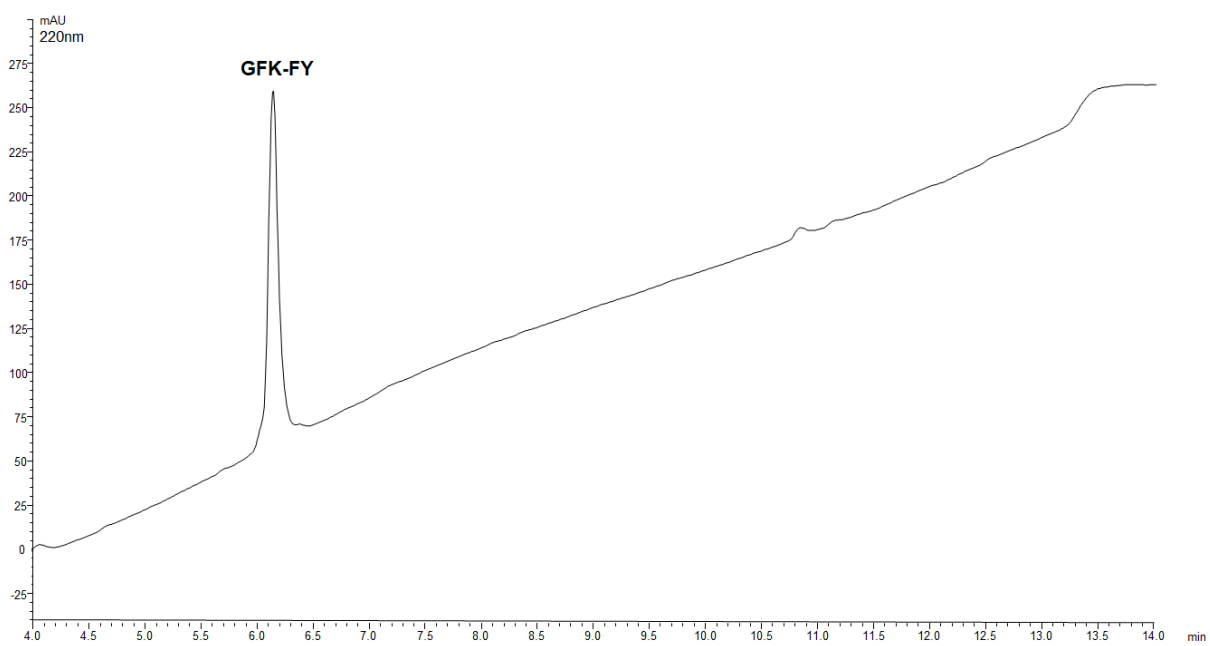

**Figure S8.** RP-HPLC of **GFK-FY** using analytical column AC2; 0.5 mL/min; gradient: 10–90 % B in 15 min;  $t_R = 6.2$  min.

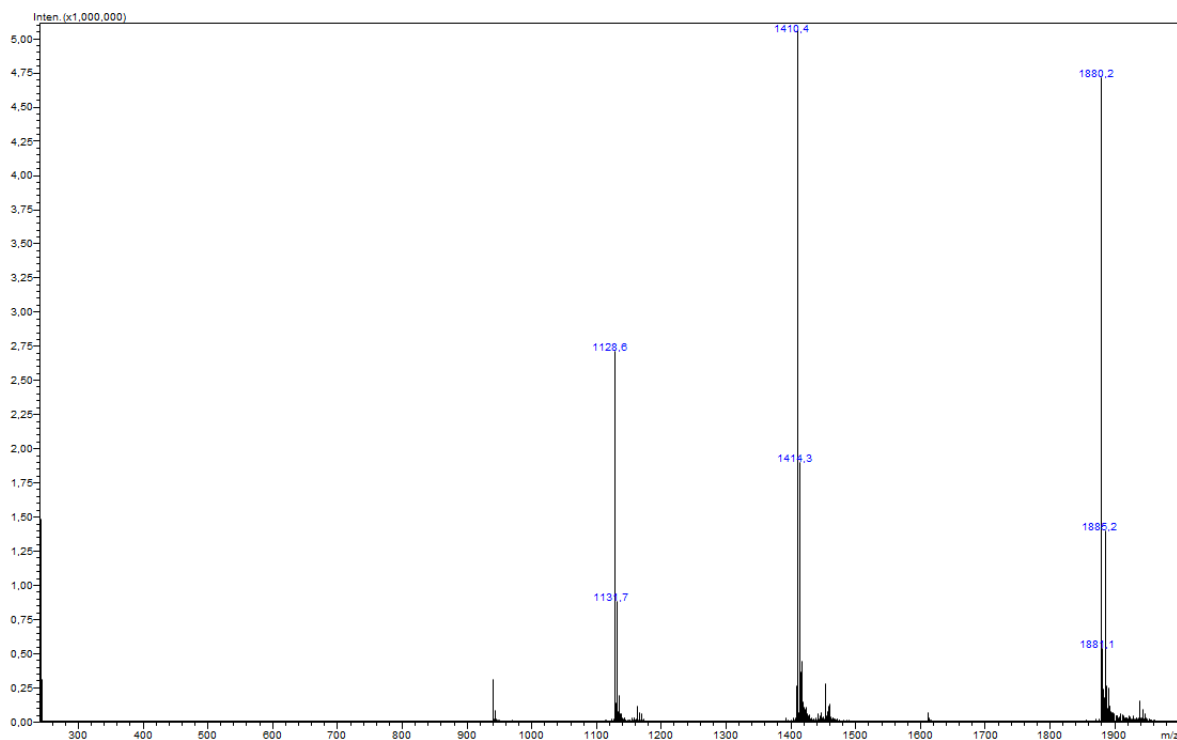

**Figure S9.** ESI-MS of **Y0**. m/z corresponds to molecular composition as follows: 1880.2  $[M+K^++2H^+]^{3+}$ , 1410.4  $[M+K^++3H^+]^{4+}$ , 1128.6  $[M+K^++4H^+]^{5+}$ .

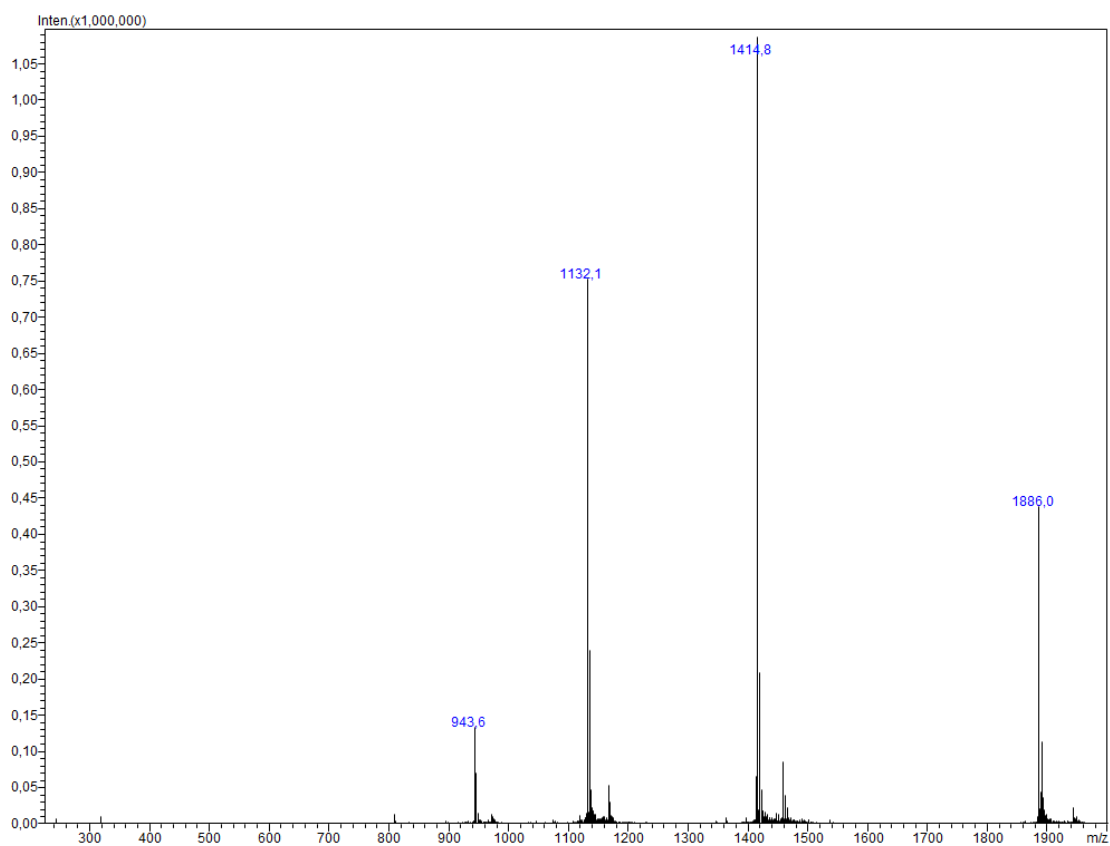

**Figure S10.** ESI-MS of **Y3**. m/z corresponds to molecular composition as follows: 1886.0  $[M+3H^+]^{3+}$ , 1414.8  $[M+4H^+]^{4+}$ , 1132.1  $[M+5H^+]^{5+}$ , 943.6  $[M+6H^+]^{6+}$ .

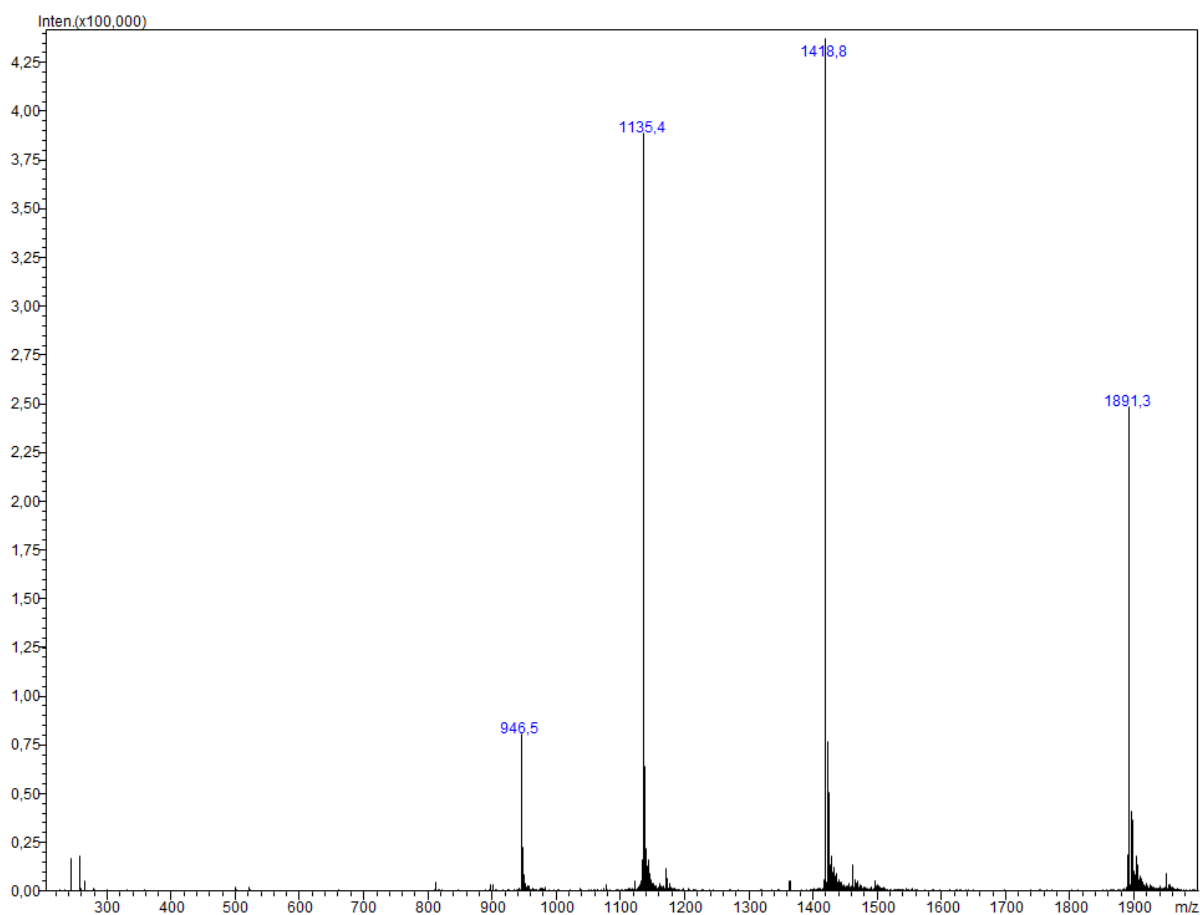

**Figure S11.** ESI-MS of **Y4**.  $m/z$  corresponds to molecular composition as follows: 1891.3  $[M+3H^+]^{3+}$ , 1418.9  $[M+4H^+]^{4+}$ , 1135.1  $[M+5H^+]^{5+}$ , 946.5  $[M+6H^+]^{6+}$ .

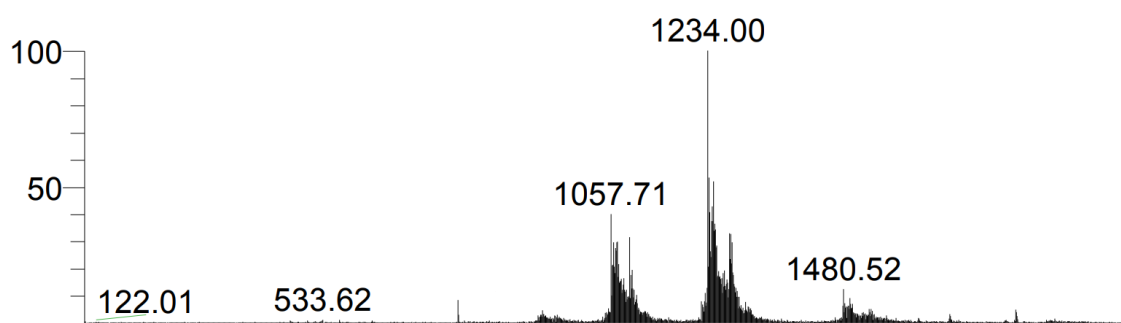

**Figure S12.** ESI-MS of **GFK-Y4**.  $m/z$  corresponds to molecular composition as follows: 1480.52  $[M+5H^+]^{5+}$ , 1234.00  $[M+6H^+]^{6+}$ , 1057.71  $[M+7H^+]^{7+}$ .

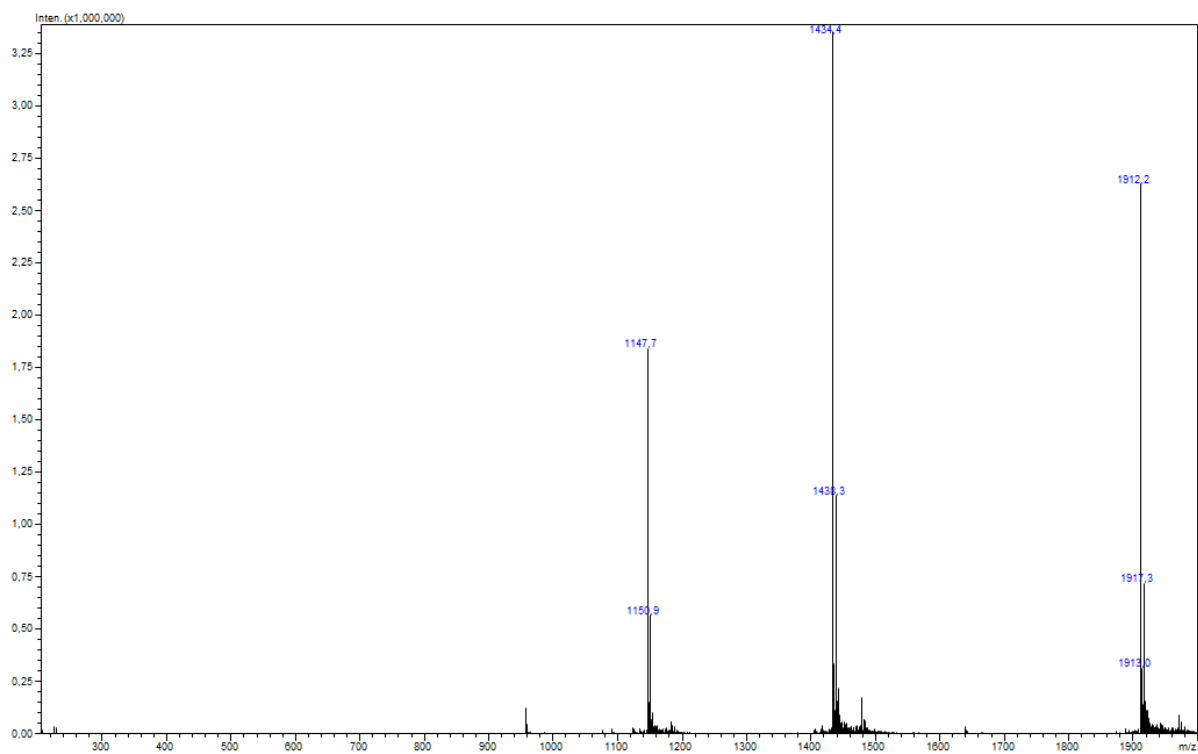

**Figure S13.** ESI-MS of **Y8**. m/z corresponds to molecular composition as follows: 1912.2  $[M+3H]^{3+}$ , 1434.4  $[M+4H]^{4+}$ , 1147.7  $[M+5H]^{5+}$ .

## 2. Radio-HPLC

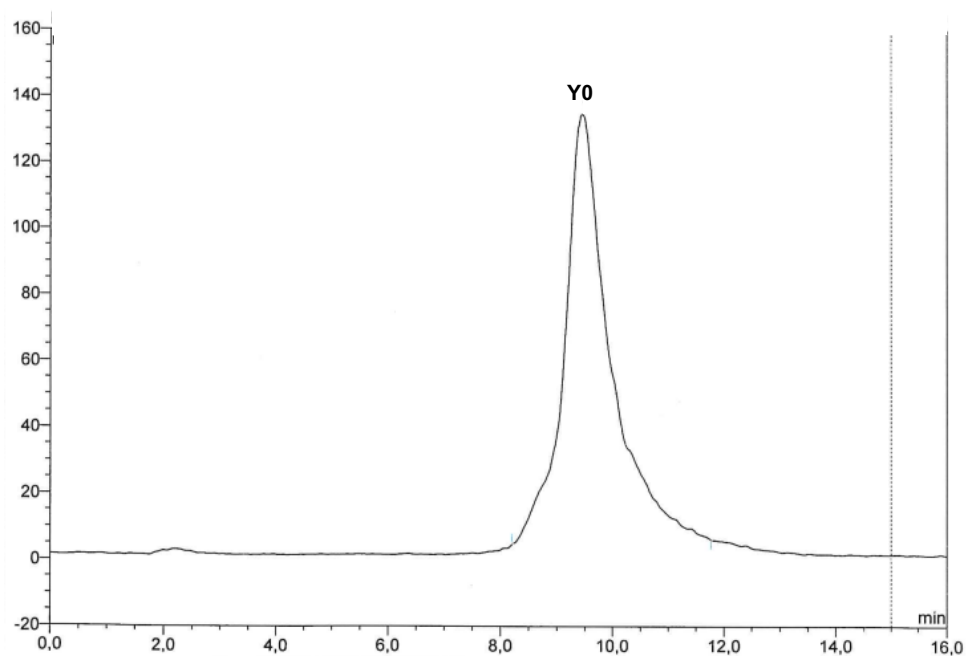

**Figure S14.** Radio-RP-HPLC of  $^{177}\text{Lu}$ -Y0 performed using analytical column AC1; 1 mL/min; gradient: 0–99 % B in 15 min;  $t_R = 9.5$  min. Radiochemical purity: 98%.



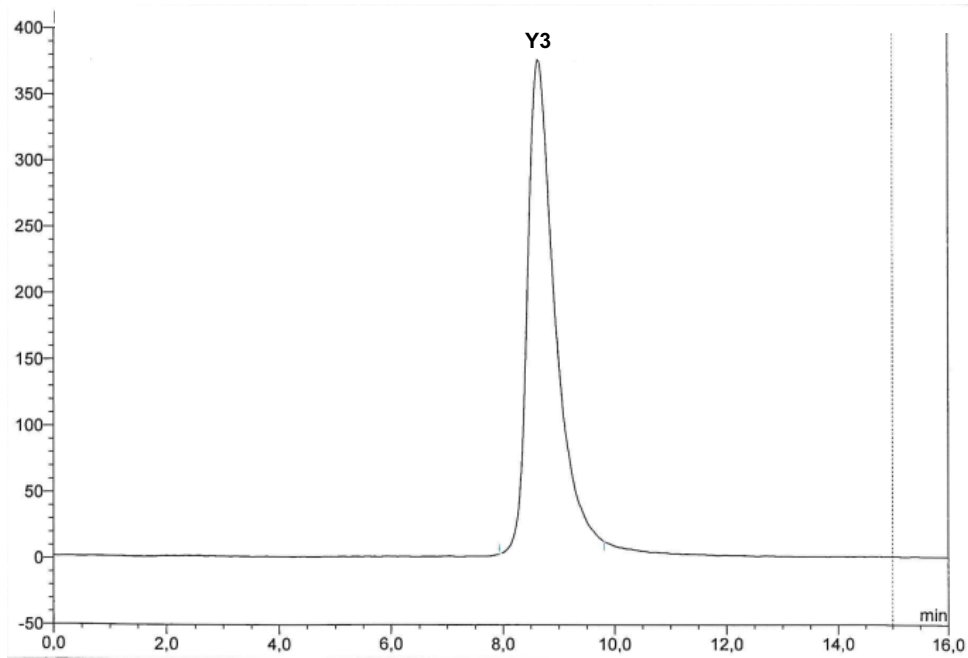

**Figure S15.** Radio-RP-HPLC of  $^{177}\text{Lu}$ -**Y3** performed using analytical column AC1; 1 mL/min; gradient: 0–99 % B in 15 min;  $t_R = 8.6$  min. Radiochemical purity = 100%.

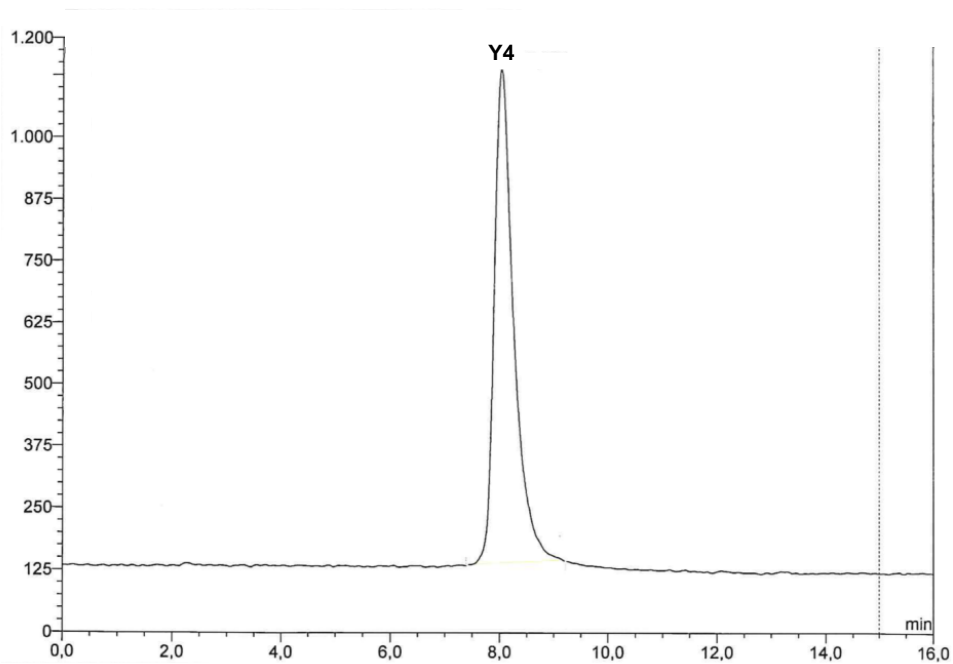

**Figure S16.** Radio-RP-HPLC of  $^{177}\text{Lu}$ -**Y4** performed using analytical column AC1; 1 mL/min; gradient: 0–99 % B in 15 mins;  $t_R = 8$  min. Radiochemical purity = 100%.

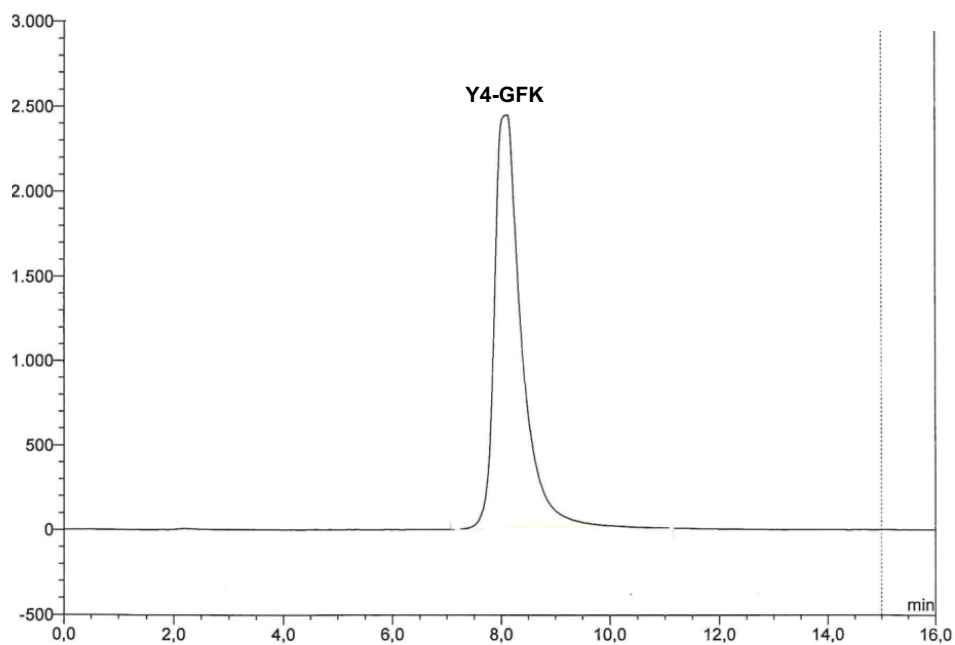

**Figure S17.** Radio-RP-HPLC of  $^{177}\text{Lu}$ -GFK-Y4 performed using analytical column AC1; 1 mL/min; gradient: 0–99 % B 15 min;  $t_R = 8.1$  min. Radiochemical purity = 100%.

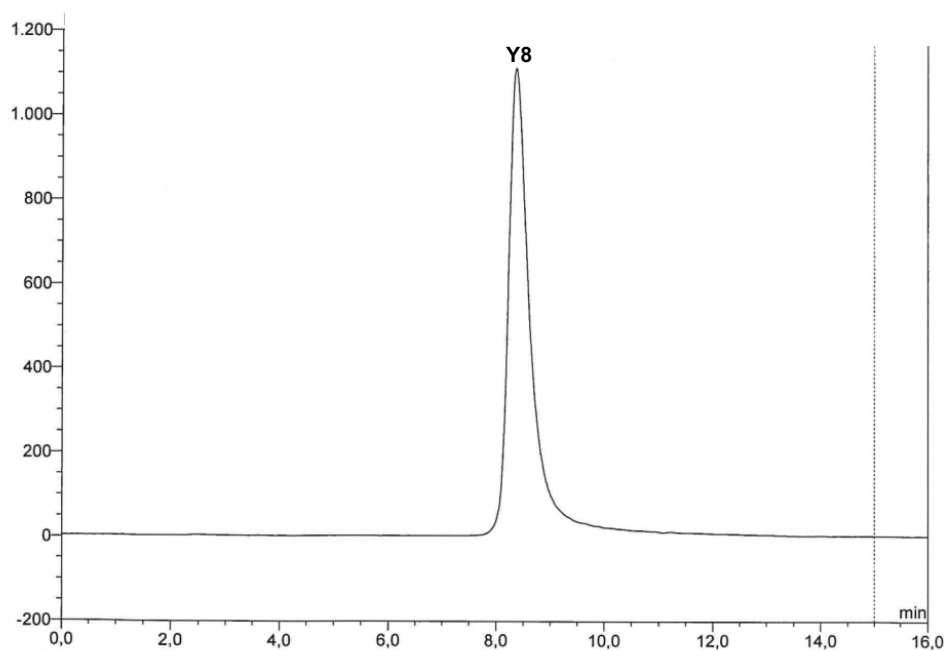

**Figure S18.** Radio-RP-HPLC of  $^{177}\text{Lu}$ -Y8 performed using analytical column AC1; 1 mL/min; gradient: 0–99 % B in 15 min;  $t_R = 8.4$  min. Radiochemical purity = 100%.

### 3. Radio-TLC

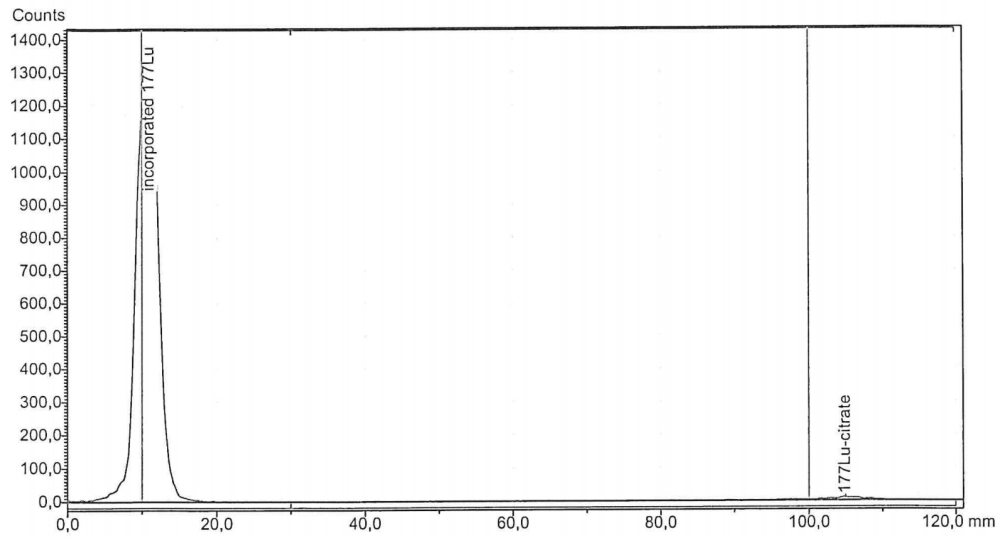

Regions: TLC

| Name               | Start (mm) | End (mm) | Retention (RF) | Height (Counts) | Area (Counts) | %ROI (%) | %Total (%) |
|--------------------|------------|----------|----------------|-----------------|---------------|----------|------------|
| incorporated 177Lu | 0,0        | 30,0     | 0,0            | 1379,0          | 23718,0       | 98,60    | 98,60      |
| 177Lu-citrate      | 30,0       | 120,0    | 1,1            | 14,0            | 337,0         | 1,40     | 1,40       |
| 2 Peaks            |            |          |                |                 | 24055,0       | 100,00   | 100,00     |

**Figure S19.** Radio-TLC for  $^{177}\text{Lu-Y0}$ ; mobile phase: 0.1 M trisodium citrate.

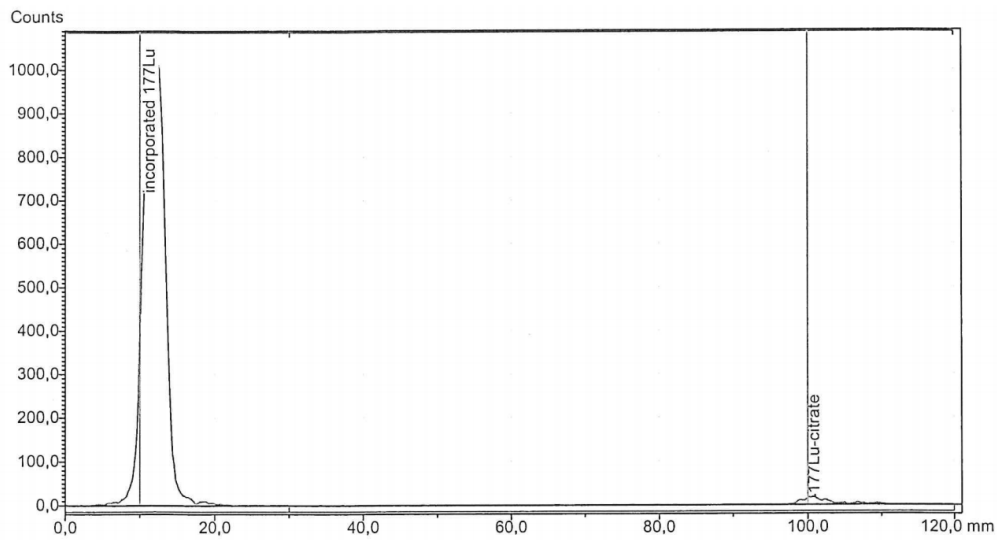

Regions: TLC

| Name               | Start (mm) | End (mm) | Retention (RF) | Height (Counts) | Area (Counts) | %ROI (%) | %Total (%) |
|--------------------|------------|----------|----------------|-----------------|---------------|----------|------------|
| incorporated 177Lu | 0,0        | 30,0     | 0,0            | 1049,0          | 18362,0       | 97,72    | 97,72      |
| 177Lu-citrate      | 30,0       | 120,0    | 1,0            | 20,0            | 428,0         | 2,28     | 2,28       |
| 2 Peaks            |            |          |                |                 | 18790,0       | 100,00   | 100,00     |

**Figure S20.** Radio-TLC for  $^{177}\text{Lu-Y3}$ ; mobile phase: 0.1 M trisodium citrate.

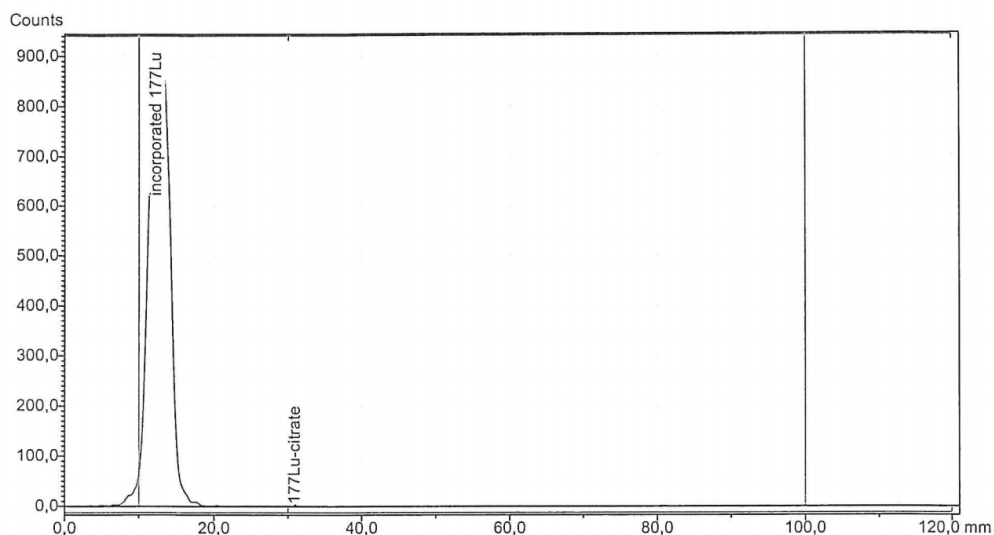

Regions: TLC

| Name               | Start (mm) | End (mm) | Retention (RF) | Height (Counts) | Area (Counts) | %ROI (%) | %Total (%) |
|--------------------|------------|----------|----------------|-----------------|---------------|----------|------------|
| incorporated 177Lu | 0,0        | 30,0     | 0,0            | 908,0           | 15340,0       | 99,92    | 99,92      |
| 177Lu-citrate      | 30,0       | 120,0    | 0,2            | 3,0             | 12,0          | 0,08     | 0,08       |
| 2 Peaks            |            |          |                |                 | 15352,0       | 100,00   | 100,00     |

**Figure S21.** Radio-TLC for  $^{177}\text{Lu-Y4}$ ; mobile phase: 0.1 M trisodium citrate.

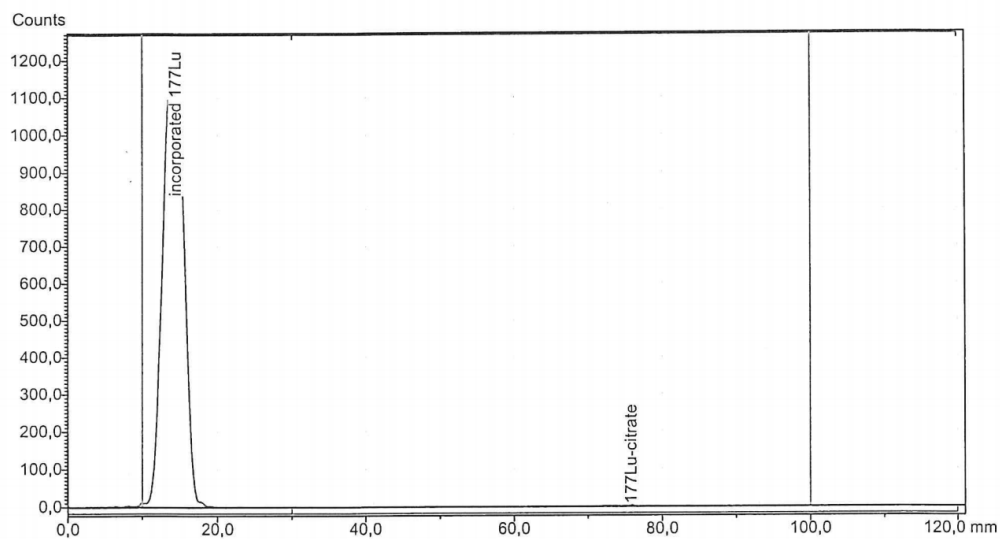

Regions: TLC

| Name               | Start (mm) | End (mm) | Retention (RF) | Height (Counts) | Area (Counts) | %ROI (%) | %Total (%) |
|--------------------|------------|----------|----------------|-----------------|---------------|----------|------------|
| incorporated 177Lu | 0,0        | 30,0     | 0,1            | 1225,0          | 19340,0       | 99,78    | 99,78      |
| 177Lu-citrate      | 30,0       | 120,0    | 0,7            | 4,0             | 43,0          | 0,22     | 0,22       |
| 2 Peaks            |            |          |                |                 | 19383,0       | 100,00   | 100,00     |

**Figure S22.** Radio-TLC for  $^{177}\text{Lu-GFK-Y4}$ ; mobile phase: 0.1 M trisodium citrate.

Chromatogram: TLC

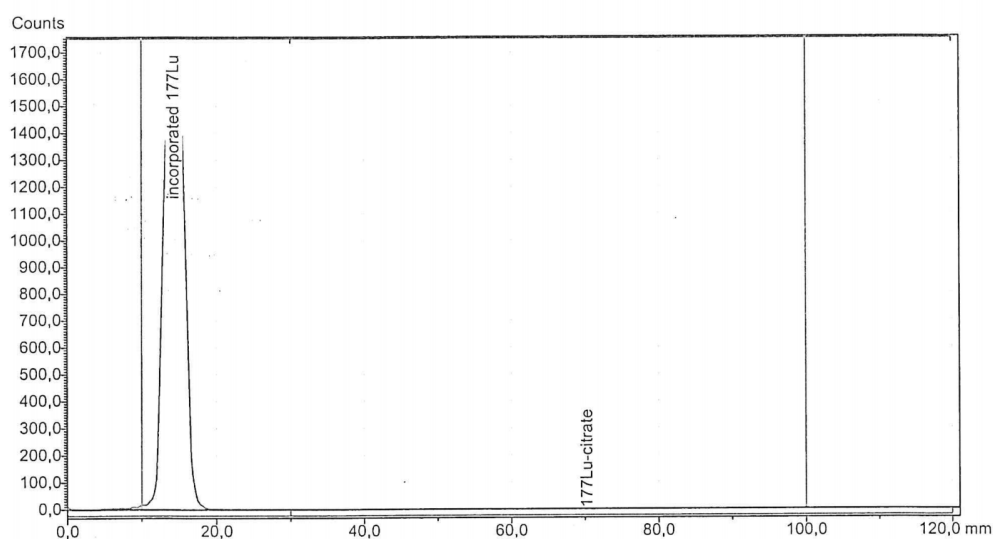

Regions: TLC

| Name               | Start (mm) | End (mm) | Retention (RF) | Height (Counts) | Area (Counts) | %ROI (%) | %Total (%) |
|--------------------|------------|----------|----------------|-----------------|---------------|----------|------------|
| incorporated 177Lu | 0,0        | 30,0     | 0,0            | 1690,0          | 27045,0       | 99,95    | 99,95      |
| 177Lu-citrate      | 30,0       | 120,0    | 0,7            | 1,0             | 14,0          | 0,05     | 0,05       |
| 2 Peaks            |            |          |                |                 | 27059,0       | 100,00   | 100,00     |

**Figure S23.** Radio-TLC for  $^{177}\text{Lu-Y8}$ ; mobile phase: 0.1 M trisodium citrate.

## 4. Biodistribution data

**Table S1:** Biodistribution data for  $^{177}\text{Lu-Y0}$  ( $n = 4$ ;  $90 \pm 24$  pmol), in H2009 bearing SCID mice. Data are given as averages  $\pm$  standard deviation. %IA/g = percent injected activity per gram tissue.

| $^{177}\text{Lu-Y0}$    | 90 min p.i.     |                   |
|-------------------------|-----------------|-------------------|
|                         | %IA/g           | tumor/organ ratio |
| Blood                   | 1.20 $\pm$ 0.23 | 2.7 $\pm$ 0.7     |
| Heart (myocard)         | 1.13 $\pm$ 0.62 | 3.0 $\pm$ 0.5     |
| Lung                    | 3.59 $\pm$ 1.01 | 0.9 $\pm$ 0.1     |
| Liver                   | 5.03 $\pm$ 1.98 | 0.7 $\pm$ 0.2     |
| Spleen                  | 2.22 $\pm$ 1.11 | 1.6 $\pm$ 0.4     |
| Pancreas                | 0.49 $\pm$ 0.13 | 6.7 $\pm$ 1.7     |
| Stomach (empty)         | 4.15 $\pm$ 1.03 | 0.8 $\pm$ 0.2     |
| Small intestine (empty) | 1.67 $\pm$ 0.41 | 2.0 $\pm$ 0.6     |
| Large intestine (empty) | 3.00 $\pm$ 0.32 | 1.1 $\pm$ 0.4     |
| Kidneys                 | 208 $\pm$ 65    | 0.0 $\pm$ 0.0     |
| Adrenals                | 1.36 $\pm$ 0.79 | 2.9 $\pm$ 1.3     |
| Muscle                  | 0.53 $\pm$ 0.13 | 6.0 $\pm$ 1.1     |
| Bone                    | 1.45 $\pm$ 0.57 | 2.4 $\pm$ 0.7     |
| Tumor H2009             | 3.23 $\pm$ 1.17 |                   |

**Table S2:** Biodistribution data for  $^{177}\text{Lu-Y0}$  ( $n = 5$ ;  $92 \pm 11$  pmol), in H2009 bearing SCID mice. Data are given as averages  $\pm$  standard deviation. %IA/g = percent injected activity per gram tissue.

| $^{177}\text{Lu-Y0}$    | 3 d p.i.        |                 |                   |
|-------------------------|-----------------|-----------------|-------------------|
|                         | Organ/Tissue    | %IA/g           | tumor/organ ratio |
| Blood                   | 0.02 $\pm$ 0.00 | 97.5 $\pm$ 10.4 |                   |
| Heart (myocard)         | 0.43 $\pm$ 0.07 | 4.3 $\pm$ 0.7   |                   |
| Lung                    | 1.22 $\pm$ 0.17 | 1.5 $\pm$ 0.1   |                   |
| Liver                   | 2.61 $\pm$ 0.42 | 0.7 $\pm$ 0.1   |                   |
| Spleen                  | 1.58 $\pm$ 0.26 | 1.1 $\pm$ 0.2   |                   |
| Pancreas                | 0.31 $\pm$ 0.09 | 6.3 $\pm$ 1.9   |                   |
| Stomach (empty)         | 2.63 $\pm$ 0.68 | 0.8 $\pm$ 0.3   |                   |
| Small intestine (empty) | 0.82 $\pm$ 0.25 | 2.2 $\pm$ 0.6   |                   |
| Large intestine (empty) | 1.19 $\pm$ 0.53 | 2.1 $\pm$ 1.5   |                   |
| Kidneys                 | 243 $\pm$ 56    | 0.0 $\pm$ 0.0   |                   |
| Adrenals                | 0.82 $\pm$ 0.06 | 2.1 $\pm$ 0.1   |                   |
| Muscle                  | 0.29 $\pm$ 0.11 | 8.2 $\pm$ 6.4   |                   |
| Bone                    | 0.42 $\pm$ 0.14 | 5.0             | 2.4               |
| Tumor H2009             | 1.72 $\pm$ 0.07 |                 |                   |

**Table S3:** Biodistribution data for  $^{177}\text{Lu-Y3}$  ( $n = 3$ ;  $139 \pm 59$  pmol), in H2009 bearing SCID mice. Data are given as averages  $\pm$  standard deviation. %IA/g = percent injected activity per gram tissue.

| $^{177}\text{Lu-Y3}$    | 90 min p.i.     |                |                   |
|-------------------------|-----------------|----------------|-------------------|
|                         | Organ/Tissue    | %IA/g          | tumor/organ ratio |
| Blood                   | 1.11 $\pm$ 0.14 | 3.4 $\pm$ 0.4  |                   |
| Heart (myocard)         | 0.65 $\pm$ 0.12 | 5.8 $\pm$ 0.7  |                   |
| Lung                    | 4.91 $\pm$ 0.51 | 0.8 $\pm$ 0.1  |                   |
| Liver                   | 7.59 $\pm$ 3.21 | 0.6 $\pm$ 0.3  |                   |
| Spleen                  | 8.50 $\pm$ 2.27 | 0.5 $\pm$ 0.1  |                   |
| Pancreas                | 0.36 $\pm$ 0.05 | 10.3 $\pm$ 1.2 |                   |
| Stomach (empty)         | 7.42 $\pm$ 0.32 | 0.5 $\pm$ 0.0  |                   |
| Small intestine (empty) | 2.49 $\pm$ 0.46 | 1.5 $\pm$ 0.2  |                   |
| Large intestine (empty) | 3.43 $\pm$ 0.68 | 1.1 $\pm$ 0.2  |                   |
| Kidneys                 | 141 $\pm$ 30    | 0.0 $\pm$ 0.0  |                   |
| Adrenals                | 1.04 $\pm$ 0.44 | 3.9 $\pm$ 1.2  |                   |
| Muscle                  | 0.57 $\pm$ 0.10 | 6.6 $\pm$ 0.9  |                   |
| Bone                    | 1.51 $\pm$ 0.14 | 2.5            | 0.1               |
| Tumor H2009             | 3.70 $\pm$ 0.16 |                |                   |

**Table S4:** Biodistribution data for  $^{177}\text{Lu-Y3}$  ( $n=5$ ;  $42 \pm 6$  pmol), in H2009 bearing SCID mice. Data are given as averages  $\pm$  standard deviation. %IA/g = percent injected activity per gram tissue.

| $^{177}\text{Lu-Y3}$    | 3 d p.i.        |                   |
|-------------------------|-----------------|-------------------|
| Organ/Tissue            | %IA/g           | tumor/organ ratio |
| Blood                   | 0.02 $\pm$ 0.00 | 128.6 $\pm$ 22.2  |
| Heart (myocard)         | 0.22 $\pm$ 0.04 | 9.4 $\pm$ 2.6     |
| Lung                    | 1.22 $\pm$ 0.16 | 1.7 $\pm$ 0.4     |
| Liver                   | 1.17 $\pm$ 0.33 | 1.9 $\pm$ 0.6     |
| Spleen                  | 1.36 $\pm$ 0.54 | 1.7 $\pm$ 0.6     |
| Pancreas                | 0.25 $\pm$ 0.17 | 10.6 $\pm$ 4.8    |
| Stomach (empty)         | 4.76 $\pm$ 1.37 | 0.5 $\pm$ 0.2     |
| Small intestine (empty) | 0.37 $\pm$ 0.18 | 6.6 $\pm$ 3.2     |
| Large intestine (empty) | 1.34 $\pm$ 0.72 | 2.3 $\pm$ 1.9     |
| Kidneys                 | 250 $\pm$ 33    | 0.0 $\pm$ 0.0     |
| Adrenals                | 0.27 $\pm$ 0.11 | 8.4 $\pm$ 3.8     |
| Muscle                  | 0.47 $\pm$ 0.23 | 5.3 $\pm$ 2.6     |
| Bone                    | 0.35 $\pm$ 0.17 | 6.6 2.5           |
| Tumor H2009             | 2.03 $\pm$ 0.29 |                   |

**Table S5:** Biodistribution data for  $^{177}\text{Lu-Y4}$  ( $n=4$ ;  $43 \pm 7$  pmol), in H2009 bearing SCID mice. Data are given as averages  $\pm$  standard deviation. %IA/g = percent injected activity per gram tissue.

| $^{177}\text{Lu-Y4}$    | 90 min p.i.      |                   |
|-------------------------|------------------|-------------------|
| Organ/Tissue            | %IA/g            | tumor/organ ratio |
| Blood                   | 1.33 $\pm$ 0.10  | 5.2 $\pm$ 0.6     |
| Heart (myocard)         | 0.74 $\pm$ 0.19  | 9.6 $\pm$ 1.6     |
| Lung                    | 6.74 $\pm$ 0.71  | 1.0 $\pm$ 0.1     |
| Liver                   | 1.06 $\pm$ 0.13  | 6.6 $\pm$ 1.3     |
| Spleen                  | 4.71 $\pm$ 1.04  | 1.5 $\pm$ 0.4     |
| Pancreas                | 0.37 $\pm$ 0.02  | 18.6 $\pm$ 2.2    |
| Stomach (empty)         | 10.65 $\pm$ 3.09 | 0.7 $\pm$ 0.2     |
| Small intestine (empty) | 3.05 $\pm$ 1.08  | 2.6 $\pm$ 1.5     |
| Large intestine (empty) | 6.99 $\pm$ 0.20  | 1.0 $\pm$ 0.1     |
| Kidneys                 | 219 $\pm$ 17     | 0.0 $\pm$ 0.0     |
| Adrenals                | 0.52 $\pm$ 0.20  | 13.9 $\pm$ 3.4    |
| Muscle                  | 1.00 $\pm$ 0.44  | 8.2 $\pm$ 4.1     |
| Bone                    | 1.84 $\pm$ 0.20  | 3.8 0.4           |
| Tumor H2009             | 6.91 $\pm$ 0.73  |                   |

**Table S6:** Biodistribution data for  $^{177}\text{Lu-Y4}$  ( $n = 5$ ;  $64 \pm 6$  pmol), in H2009 bearing SCID mice. Data are given as averages  $\pm$  standard deviation. %IA/g = percent injected activity per gram tissue.

| $^{177}\text{Lu-Y4}$    | 3 d p.i.        |                   |
|-------------------------|-----------------|-------------------|
| Organ/Tissue            | %IA/g           | tumor/organ ratio |
| Blood                   | 0.02 $\pm$ 0.01 | 108.2 $\pm$ 40.0  |
| Heart (myocard)         | 0.27 $\pm$ 0.08 | 8.2 $\pm$ 2.3     |
| Lung                    | 1.21 $\pm$ 0.24 | 1.7 $\pm$ 0.3     |
| Liver                   | 0.88 $\pm$ 0.33 | 2.6 $\pm$ 0.8     |
| Spleen                  | 1.31 $\pm$ 0.33 | 1.7 $\pm$ 0.4     |
| Pancreas                | 0.19 $\pm$ 0.04 | 11.3 $\pm$ 1.3    |
| Stomach (empty)         | 3.88 $\pm$ 0.80 | 0.6 $\pm$ 0.1     |
| Small intestine (empty) | 0.26 $\pm$ 0.06 | 8.2 $\pm$ 1.7     |
| Large intestine (empty) | 1.33 $\pm$ 0.26 | 1.6 $\pm$ 0.3     |
| Kidneys                 | 203 $\pm$ 18    | 0.0 $\pm$ 0.0     |
| Adrenals                | 0.90 $\pm$ 0.66 | 4.1 $\pm$ 3.3     |
| Muscle                  | 0.28 $\pm$ 0.12 | 9.1 $\pm$ 5.4     |
| Bone                    | 0.55 $\pm$ 0.07 | 3.8 0.8           |
| Tumor H2009             | 2.07 $\pm$ 0.16 |                   |

**Table S7:** Biodistribution data for  $^{177}\text{Lu-GFK-Y4}$  ( $n = 4$ ;  $118 \pm 40$  pmol), in H2009 bearing SCID mice. Data are given as averages  $\pm$  standard deviation. %IA/g = percent injected activity per gram tissue.

| $^{177}\text{Lu-GFK-Y4}$ | 90 min p.i.     |                   |
|--------------------------|-----------------|-------------------|
| Organ/Tissue             | %IA/g           | tumor/organ ratio |
| Blood                    | 0.44 $\pm$ 0.09 | 4.3 $\pm$ 2.0     |
| Heart (myocard)          | 0.32 $\pm$ 0.01 | 5.5 $\pm$ 1.6     |
| Lung                     | 2.88 $\pm$ 0.37 | 0.6 $\pm$ 0.2     |
| Liver                    | 1.16 $\pm$ 0.56 | 1.7 $\pm$ 0.6     |
| Spleen                   | 0.89 $\pm$ 0.22 | 2.1 $\pm$ 0.9     |
| Pancreas                 | 0.14 $\pm$ 0.01 | 12.2 $\pm$ 3.7    |
| Stomach (empty)          | 3.29 $\pm$ 0.53 | 0.6 $\pm$ 0.2     |
| Small intestine (empty)  | 0.73 $\pm$ 0.14 | 2.5 $\pm$ 1.0     |
| Large intestine (empty)  | 1.76 $\pm$ 0.55 | 1.1 $\pm$ 0.7     |
| Kidneys                  | 274 $\pm$ 75    | 0.0 $\pm$ 0.0     |
| Adrenals                 | 0.95 $\pm$ 0.66 | 2.2 $\pm$ 0.9     |
| Muscle                   | 0.26 $\pm$ 0.06 | 7.2 $\pm$ 3.0     |
| Bone                     | 0.49 $\pm$ 0.03 | 3.6 1.1           |
| Tumor H2009              | 1.74 $\pm$ 0.48 |                   |



**Table S8:** Biodistribution data for  $^{177}\text{Lu-GFK-Y4}$  ( $n = 5$ ;  $70 \pm 39$  pmol), in H2009 bearing SCID mice. Data are given as averages  $\pm$  standard deviation. %IA/g = percent injected activity per gram tissue.

| $^{177}\text{Lu-GFK-Y4}$ | 3 d p.i.        |                 |                   |
|--------------------------|-----------------|-----------------|-------------------|
|                          | Organ/Tissue    | %IA/g           | tumor/organ ratio |
| Blood                    | 0.02 $\pm$ 0.01 | 56.1 $\pm$ 25.7 |                   |
| Heart (myocard)          | 0.12 $\pm$ 0.03 | 6.9 $\pm$ 2.1   |                   |
| Lung                     | 0.50 $\pm$ 0.26 | 1.8 $\pm$ 0.7   |                   |
| Liver                    | 0.48 $\pm$ 0.22 | 2.0 $\pm$ 1.1   |                   |
| Spleen                   | 0.86 $\pm$ 0.37 | 1.0 $\pm$ 0.4   |                   |
| Pancreas                 | 0.08 $\pm$ 0.02 | 9.9 $\pm$ 4.1   |                   |
| Stomach (empty)          | 2.42 $\pm$ 0.83 | 0.4 $\pm$ 0.1   |                   |
| Small intestine (empty)  | 0.15 $\pm$ 0.04 | 5.6 $\pm$ 1.9   |                   |
| Large intestine (empty)  | 0.78 $\pm$ 0.42 | 1.4 $\pm$ 1.0   |                   |
| Kidneys                  | 169 $\pm$ 37    | 0.0 $\pm$ 0.0   |                   |
| Adrenals                 | 0.25 $\pm$ 0.10 | 3.7 $\pm$ 0.9   |                   |
| Muscle                   | 0.13 $\pm$ 0.06 | 6.9 $\pm$ 3.9   |                   |
| Bone                     | 0.25 $\pm$ 0.06 | 3.2             | 1.2               |
| Tumor H2009              | 0.77 $\pm$ 0.19 |                 |                   |

**Table S9:** Biodistribution data ( min p.i.) for  $^{177}\text{Lu-Y8}$  without ( $n = 4$ ;  $124 \pm 24$  pmol) and with ( $n = 2$ ) addition of 50 nmol of non-labeled compound, in H2009 bearing SCID mice. Data are given as averages  $\pm$  standard deviation. %IA/g = percent injected activity per gram tissue.

| $^{177}\text{Lu-Y8}$    | 90 min p.i.     |                | + 50 nmol cold    |                          |
|-------------------------|-----------------|----------------|-------------------|--------------------------|
|                         | Organ/Tissue    | %IA/g          | tumor/organ ratio | 10 min prior to activity |
| Blood                   | 2.54 $\pm$ 0.56 | 2.4 $\pm$ 0.5  | 1.06 $\pm$ 0.31   |                          |
| Heart (myocard)         | 1.01 $\pm$ 0.19 | 5.9 $\pm$ 1.3  | 0.64 $\pm$ 0.14   |                          |
| Lung                    | 5.63 $\pm$ 0.44 | 1.0 $\pm$ 0.1  | 3.39 $\pm$ 0.70   |                          |
| Liver                   | 1.16 $\pm$ 0.15 | 5.1 $\pm$ 1.0  | 0.70 $\pm$ 0.06   |                          |
| Spleen                  | 8.41 $\pm$ 1.93 | 0.7 $\pm$ 0.3  | 4.99 $\pm$ 0.34   |                          |
| Pancreas                | 0.42 $\pm$ 0.08 | 14.3 $\pm$ 3.6 | 0.19 $\pm$ 0.01   |                          |
| Stomach (empty)         | 8.26 $\pm$ 0.91 | 0.7 $\pm$ 0.2  | 1.19 $\pm$ 0.30   |                          |
| Small intestine (empty) | 3.00 $\pm$ 0.61 | 2.1 $\pm$ 0.8  | 0.62 $\pm$ 0.09   |                          |
| Large intestine (empty) | 3.66 $\pm$ 1.06 | 1.8 $\pm$ 0.8  | 0.89 $\pm$ 0.14   |                          |
| Kidneys                 | 166 $\pm$ 26    | 0.0 $\pm$ 0.0  | 178 $\pm$ 7       |                          |
| Adrenals                | 0.71 $\pm$ 0.20 | 8.9 $\pm$ 3.7  | 0.53 $\pm$ 0.21   |                          |
| Muscle                  | 0.87 $\pm$ 0.35 | 7.4 $\pm$ 2.7  | 0.20 $\pm$ 0.08   |                          |
| Bone                    | 3.24            | 0.20           | 1.8               | 0.4                      |
| Tumor H2009             | 5.89 $\pm$ 1.09 |                | 1.71 $\pm$ 0.41   |                          |

**Table S10:** Biodistribution data for  $^{177}\text{Lu-Y8}$  ( $n = 5$ ;  $154 \pm 14$  pmol), in H2009 bearing SCID mice. Data are given as averages  $\pm$  standard deviation. %IA/g = percent injected activity per gram tissue.

| $^{177}\text{Lu-Y8}$    |                 | 24 h p.i.         |           |
|-------------------------|-----------------|-------------------|-----------|
| Organ/Tissue            | %IA/g           | tumor/organ ratio |           |
| Blood                   | 0.04 $\pm$ 0.01 | 59.6              | $\pm$ 9.9 |
| Heart (myocard)         | 0.16 $\pm$ 0.03 | 15.2              | $\pm$ 3.6 |
| Lung                    | 1.20 $\pm$ 0.19 | 2.1               | $\pm$ 0.7 |
| Liver                   | 0.98 $\pm$ 0.40 | 2.7               | $\pm$ 1.2 |
| Spleen                  | 1.89 $\pm$ 0.77 | 1.4               | $\pm$ 0.6 |
| Pancreas                | 0.14 $\pm$ 0.02 | 18.4              | $\pm$ 6.0 |
| Stomach (empty)         | 3.84 $\pm$ 1.33 | 0.7               | $\pm$ 0.4 |
| Small intestine (empty) | 1.03 $\pm$ 0.27 | 2.5               | $\pm$ 1.0 |
| Large intestine (empty) | 1.46 $\pm$ 0.55 | 1.8               | $\pm$ 0.7 |
| Kidneys                 | 235 $\pm$ 49    | 0.0               | $\pm$ 0.0 |
| Adrenals                | 0.25 $\pm$ 0.08 | 10.2              | $\pm$ 2.8 |
| Muscle                  | 0.36 $\pm$ 0.34 | 9.5               | $\pm$ 4.5 |
| Bone                    | 0.68 $\pm$ 0.08 | 3.6               | 1.0       |
| Tumor H2009             | 2.42 $\pm$ 0.58 |                   |           |

**Table S11:** Biodistribution data for  $^{177}\text{Lu-Y8}$  ( $n = 8$ ;  $199 \pm 84$  pmol), in H2009 bearing SCID mice. Data are given as averages  $\pm$  standard deviation. %IA/g = percent injected activity per gram tissue.

| $^{177}\text{Lu-Y8}$    |                 | 3 d p.i.          |            |
|-------------------------|-----------------|-------------------|------------|
| Organ/Tissue            | %IA/g           | tumor/organ ratio |            |
| Blood                   | 0.03 $\pm$ 0.01 | 67.0              | $\pm$ 27.8 |
| Heart (myocard)         | 0.13 $\pm$ 0.02 | 12.2              | $\pm$ 4.0  |
| Lung                    | 0.73 $\pm$ 0.13 | 2.2               | $\pm$ 0.8  |
| Liver                   | 0.70 $\pm$ 0.14 | 2.4               | $\pm$ 1.0  |
| Spleen                  | 2.01 $\pm$ 0.71 | 1.0               | $\pm$ 0.6  |
| Pancreas                | 0.12 $\pm$ 0.04 | 14.9              | $\pm$ 7.1  |
| Stomach (empty)         | 2.65 $\pm$ 1.11 | 0.8               | $\pm$ 0.5  |
| Small intestine (empty) | 0.16 $\pm$ 0.05 | 11.4              | $\pm$ 5.7  |
| Large intestine (empty) | 0.48 $\pm$ 0.17 | 3.6               | $\pm$ 1.4  |
| Kidneys                 | 237 $\pm$ 42    | 0.0               | $\pm$ 0.0  |
| Adrenals                | 0.22 $\pm$ 0.04 | 4.5               | $\pm$ 2.6  |
| Muscle                  | 0.23 $\pm$ 0.11 | 8.4               | $\pm$ 4.1  |
| Bone                    | 0.57 $\pm$ 0.21 | 3.4               | 1.8        |
| Tumor H2009             | 1.67 $\pm$ 0.56 |                   |            |
